# Supplementary material for: Phase pure Ni3S2 and NiS from bis(N′-ethyl-N-piperazinylcarbodithioato-S,S′)–nickel(ii) via solvent thermolysis and aerosol assisted chemical vapour deposition
Source: Royal Society of Chemistry journal article supplement (doi:10.1039/c8nj00092a), 2018-01-01
Supplement: c8nj00092a1.pdf [file c8nj00092a1.pdf]

New Journal of Chemistry

Electronic Supplementary Information

Phase pure Ni<sub>3</sub>S<sub>2</sub> and NiS from *bis*(N'-ethyl-N-piperazinylcarbodithioato-S,S')-nickel(II) via solvent thermolysis and Aerosol Assisted Chemical Vapour Deposition

Charles Gervas<sup>a</sup>, Sixberth Mlowe<sup>a</sup>, Matthew P. Akerman<sup>b</sup>, Neerish Revaprasadu<sup>a\*</sup>

<sup>a</sup>Chemistry Department, University of Zululand, Private Bag X1001, KwaDlangezwa, 3886, South Africa. Email: [RevaprasaduN@unizulu.ac.za](mailto:RevaprasaduN@unizulu.ac.za)

<sup>b</sup>School of Chemistry and Physics, University of KwaZulu-Natal, Private Bag X01, Scottsville, Pietermaritzburg, 3209, South Africa.

**Table S1:** Crystal data and structure refinement details for [Ni(Etpz-dtc)<sub>2</sub>].

| Crystal Data                       | [Ni(Etpz-dtc) <sub>2</sub> ],                                   |
|------------------------------------|-----------------------------------------------------------------|
| Chemical formula                   | C <sub>14</sub> H <sub>26</sub> N <sub>4</sub> NiS <sub>4</sub> |
| Molar mass (g mol <sup>-1</sup> )  | 437.32                                                          |
| Crystal system, space group        | Triclinic, <i>P</i> -1                                          |
| Temperature (K)                    | 100(2)                                                          |
| <i>a</i> , <i>b</i> , <i>c</i> (Å) | 6.5759(4), 8.4895(5),<br>8.8346(5)                              |
| $\alpha$ , $\beta$ , $\gamma$ (°)  | 84.185(2), 78.947(3),<br>80.038(3)                              |
| <i>V</i> (Å <sup>3</sup> )         | 475.57(5)                                                       |
| <i>Z</i>                           | 1                                                               |
| Radiation type                     | Mo K $\alpha$                                                   |
| $\mu$ (mm <sup>-1</sup> )          | 1.46                                                            |

|                                                                                       |                                  |
|---------------------------------------------------------------------------------------|----------------------------------|
| Crystal size (mm)                                                                     | 0.12 × 0.09 × 0.02               |
| <i>Data Collection</i>                                                                |                                  |
| Diffractometer                                                                        | Bruker APEXII CCD diffractometer |
| Absorption correction                                                                 | Multi-scan, SADABS               |
| $T_{\min}$ , $T_{\max}$                                                               | 0.692, 0.746                     |
| No. of measured,<br>independent and observed                                          | 8678, 2259, 2174                 |
| $[I > 2\sigma(I)]$ reflections                                                        |                                  |
| $R_{\text{int}}$                                                                      | 0.017                            |
| <i>Refinement</i>                                                                     |                                  |
| $R[F^2 > 2\sigma(F^2)]$ , $wR(F^2)$ , $S$                                             | 0.018, 0.047, 1.04               |
| No. of reflections                                                                    | 2259                             |
| No. of parameters                                                                     | 107                              |
| H-atom treatment                                                                      | H-atom parameters constrained    |
| $\Delta\rho_{\text{max}}$ , $\Delta\rho_{\text{min}}$ ( $\text{e } \text{\AA}^{-3}$ ) | 0.43, -0.18                      |

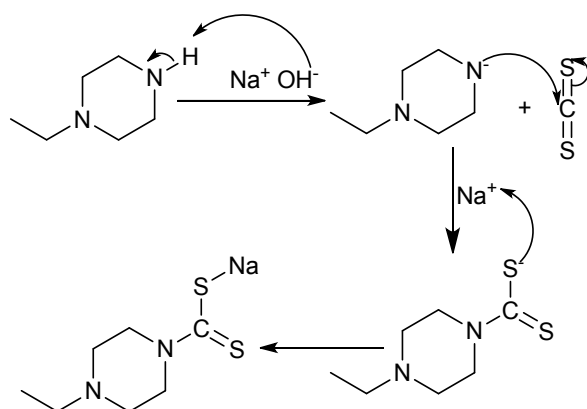

**Scheme S1:** Mechanism for preparation of sodium ethyl piperazine dithiocarbamate ligand

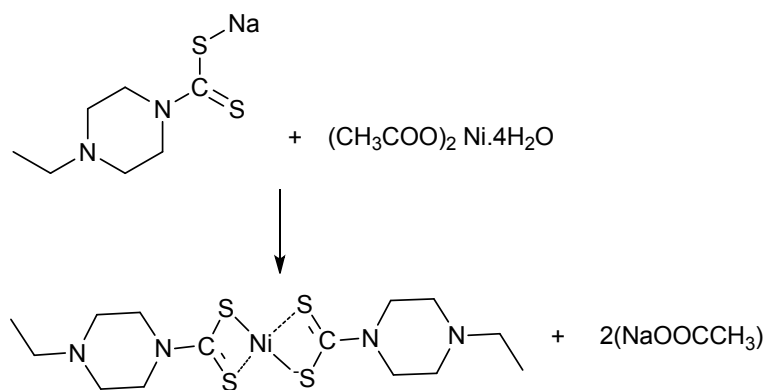

**Scheme S2:** Mechanism for the preparation of *bis*-(N'-ethyl-N-piperazinylcarbodithioato-S,S')-nickel(II) complex

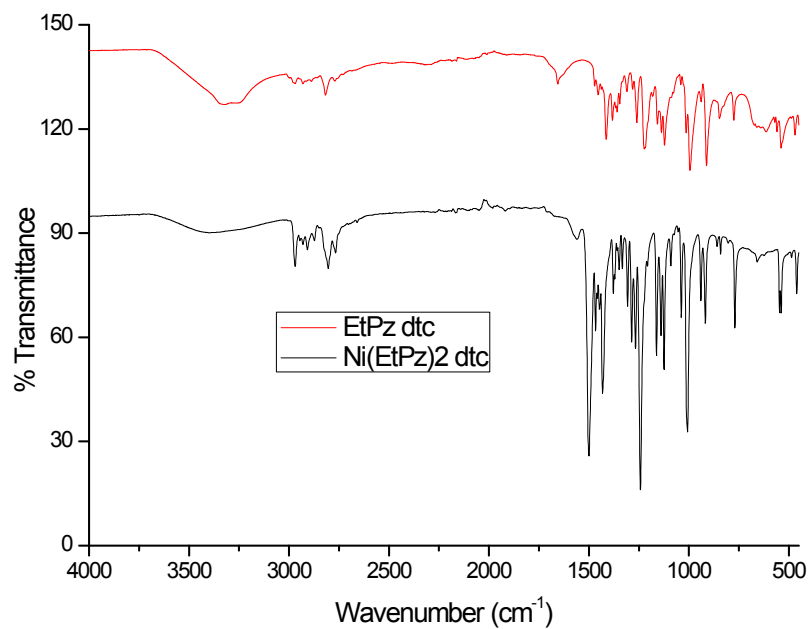

**Figure S1:** – FT-IR analysis of the ligand and nickel complex

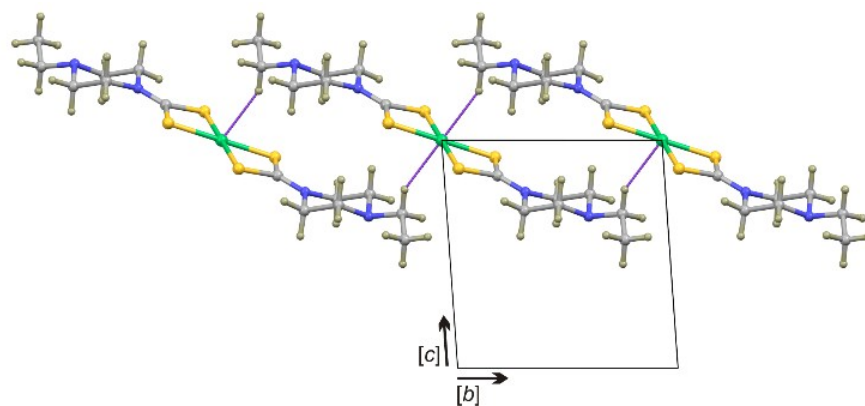

**Figure S2:** One-dimensional chain of  $[\text{Ni}(\text{Etpz-dtc})_2]$

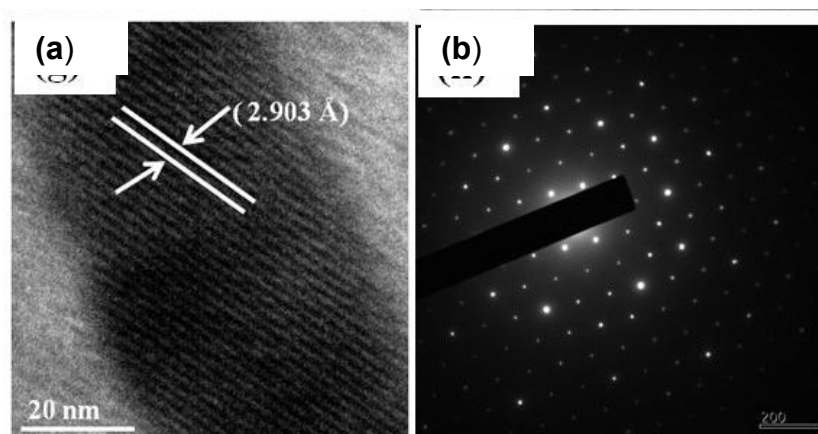

**Figure S3:** (a) HRTEM image for nickel sulfide nanoparticles capped by HDA at 270 °C, (b) SAED pattern for  $\text{Ni}_3\text{S}_2$  at 270 °C

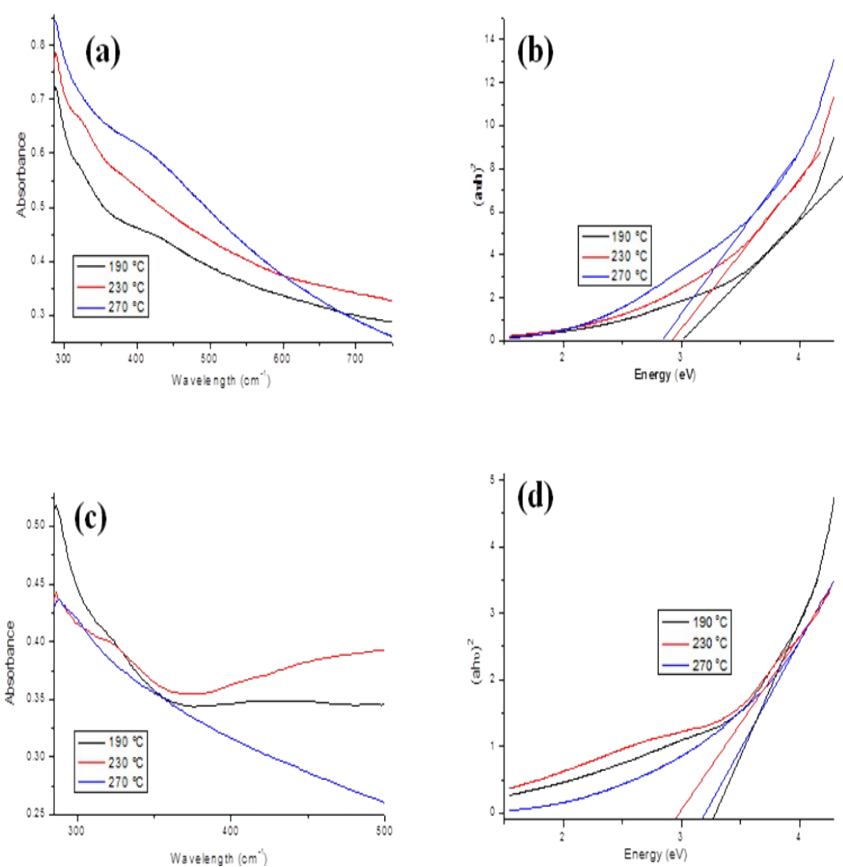

**Fig. S4.** UV-Vis spectra and Tauc plots for (a) and (b) HDA capped Ni<sub>3</sub>S<sub>2</sub> nanoparticles and (c) and (d) OLA capped Ni<sub>3</sub>S<sub>2</sub> nanoparticles at different temperatures

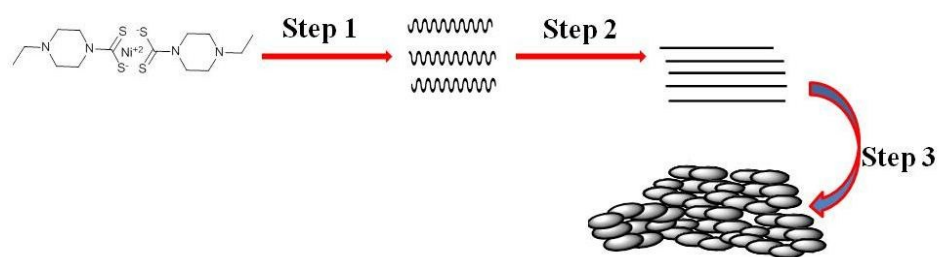

**Fig. S5:** Plausible mechanism for temperature dependent morphological evolution of as deposited Ni-S thin films

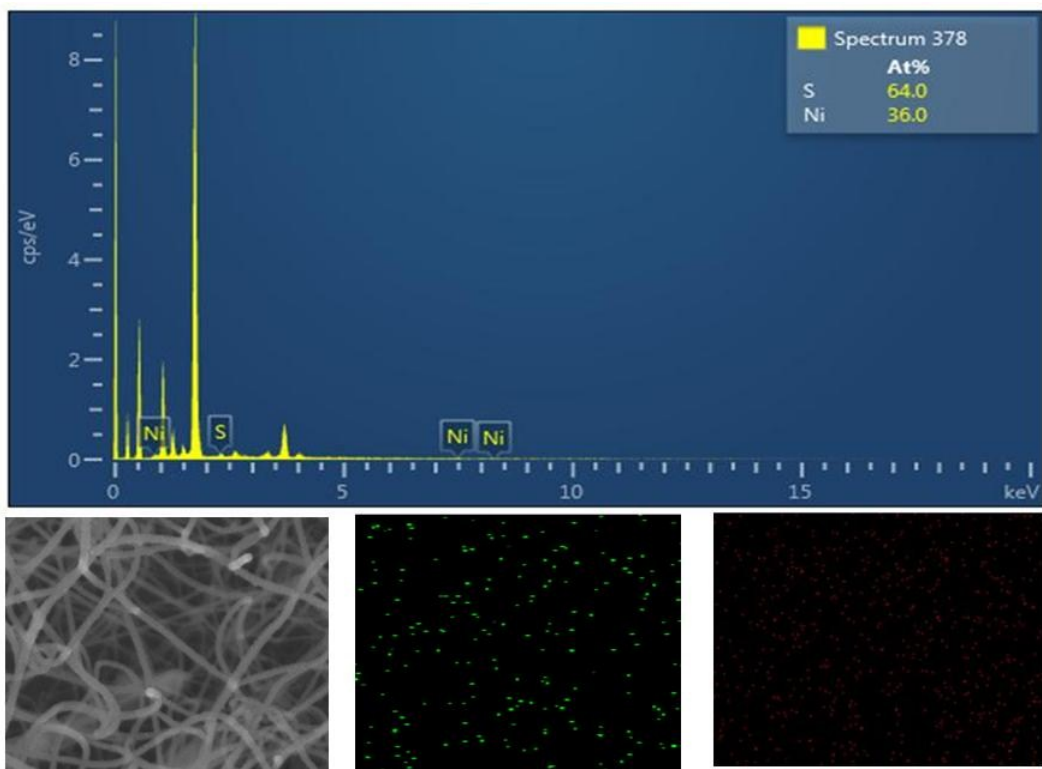

**Figure S6:** EDX for Ni-S thin films and Elemental mapping

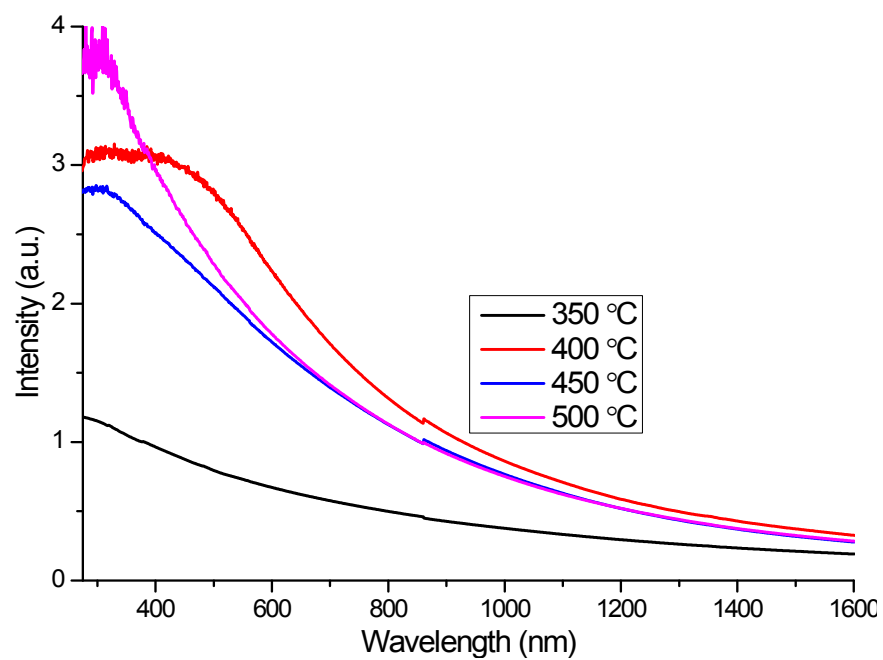

**Figure S7:** UV-Vis absorption spectra for nickel sulfide thin films deposited on a glass substrate at different temperatures
